# Supplementary material for: LncRNA GAS6-AS1 facilitates tumorigenesis and metastasis of colorectal cancer by regulating TRIM14 through miR-370-3p/miR-1296-5p and FUS
Source: Springer Nature journal article supplement (doi:10.1186/s12967-022-03550-0), 2022-08-12
Supplement: MOESM1 [file 23361654]

**Table S1. The primer sequences used in this study**

| Primer             | Sequence                      |
|--------------------|-------------------------------|
| LncRNA GAS6-AS1-F1 | 5'- ACCATGGAGGGATGTCTGGG-3'   |
| LncRNA GAS6-AS1-R1 | 5'- CCCAGCCCTTTGCATCACAT-3'   |
| TRIM14-F           | 5'- GCTTCTTTAAGGGCCTCGT-3'    |
| TRIM14-R           | 5'- GTCTGAGAGCTGGCAGTTTAT-3'  |
| $\beta$ -actin-F   | 5'-CTCACCATGGATGATGATATCGC-3' |
| $\beta$ -actin-R   | 5'-AGGAATCCTTCTGACCCA TGC-3'  |
| U6-F               | 5'-CTCGCTTCGGCAGCACATA-3'     |
| U6-R               | 5'-AACGATTCACGAATTTGCGT-3'    |
| miR-370-3p         | 5'- GCCTGCTGGGGTGGAAC-3'      |
| miR-1296-5p        | 5'- TTAGGGCCCTGGCTCCATC-3'    |
| U6                 | 5'- GAAGGATGACACGCAAATTCG-3'  |
