# Supplementary material for: LncRNA GAS6-AS1 facilitates tumorigenesis and metastasis of colorectal cancer by regulating TRIM14 through miR-370-3p/miR-1296-5p and FUS
Source: Springer Nature journal article supplement (doi:10.1186/s12967-022-03550-0), 2022-08-12
Supplement: MOESM2 [file 23361654]

**Table S2. Characteristics of TCGA-COAD patients**

| Clinical characteristics | Total<br>(446) | %    |
|--------------------------|----------------|------|
| Gender                   |                |      |
| Female                   | 211            | 47.3 |
| Male                     | 235            | 52.7 |
| Age                      |                |      |
| <60                      | 121            | 27.1 |
| ≥60                      | 325            | 72.9 |
| T                        |                |      |
| T1                       | 9              | 2.0  |
| T2                       | 76             | 17.0 |
| T3                       | 304            | 68.2 |
| T4                       | 57             | 12.8 |
| N                        |                |      |
| N0                       | 265            | 59.4 |
| N1                       | 102            | 22.9 |
| N2                       | 79             | 17.7 |
| M                        |                |      |
| M0                       | 329            | 84.4 |
| M1                       | 61             | 15.6 |
| Stage                    |                |      |
| I                        | 74             | 16.9 |
| II                       | 178            | 40.5 |
| III                      | 126            | 28.7 |
| IV                       | 61             | 13.9 |
| MSI Status               |                |      |
| MSH                      | 83             | 18.6 |
| MSL/MSS                  | 363            | 81.4 |
