# Supplementary material for: LncRNA GAS6-AS1 facilitates tumorigenesis and metastasis of colorectal cancer by regulating TRIM14 through miR-370-3p/miR-1296-5p and FUS
Source: Springer Nature journal article supplement (doi:10.1186/s12967-022-03550-0), 2022-08-12
Supplement: MOESM3 [file 23361654]

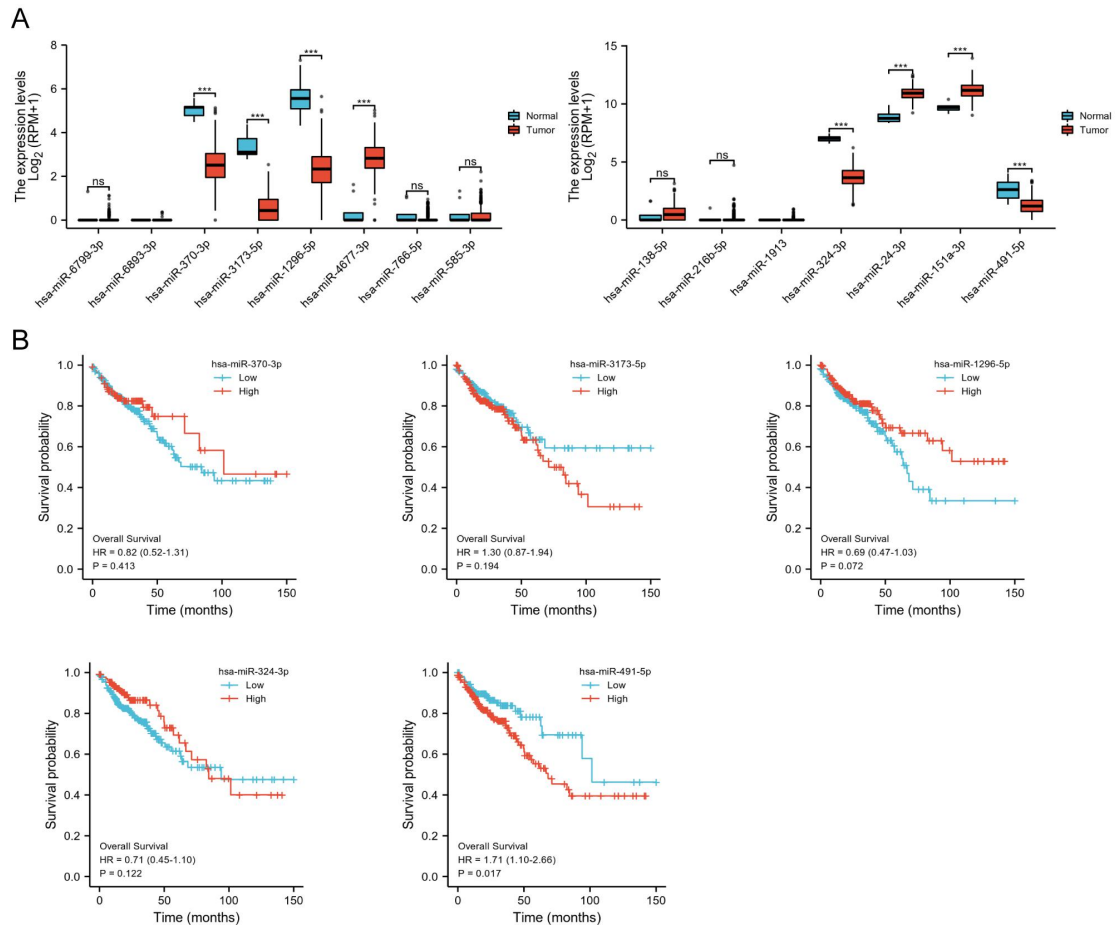

**Figure S1. The expression difference and prognosis of miRNAs that may bind to GAS6-AS1 from the TCGA database**

(A) The expression difference of 15 miRNAs in TCGA-COAD dataset. (B) Kaplan-Meier analysis of overall survival of the miRNAs. ns: none significance, \*  $P < 0.05$ , \*\*  $P < 0.01$ , \*\*\*\*  $P < 0.0001$ .
